# Supplementary figures and images for: Phosphoinositide-dependent regulation of VAN3 ARF-GAP localization and activity essential for vascular tissue continuity in plants
Source: Oxford University Press journal article supplement (doi:10.1242/dev.030098), 2009-04-10

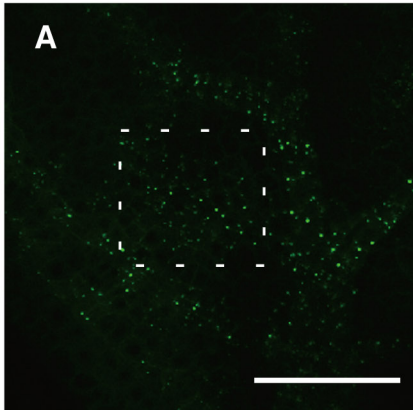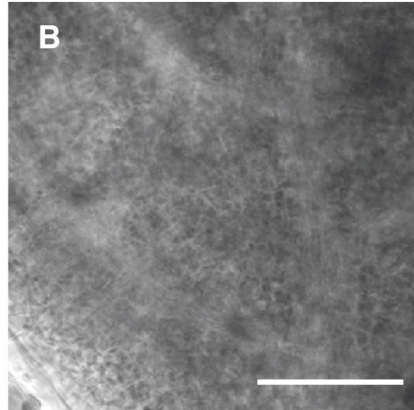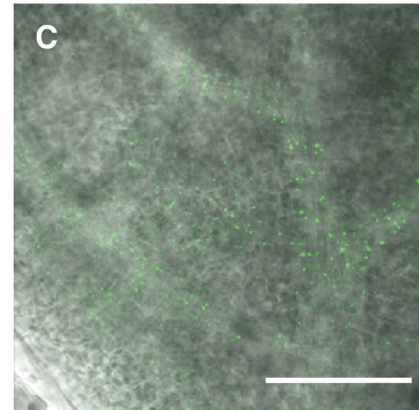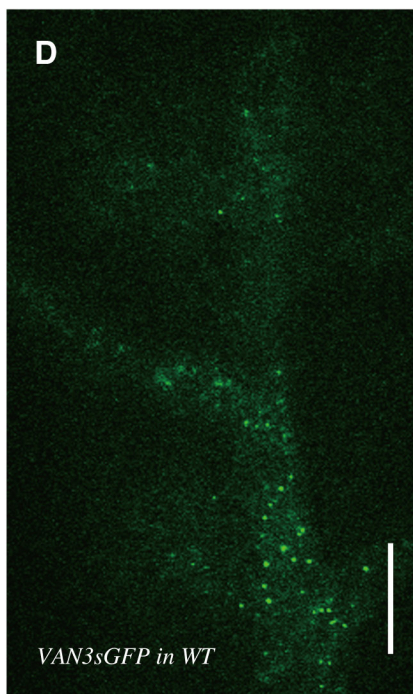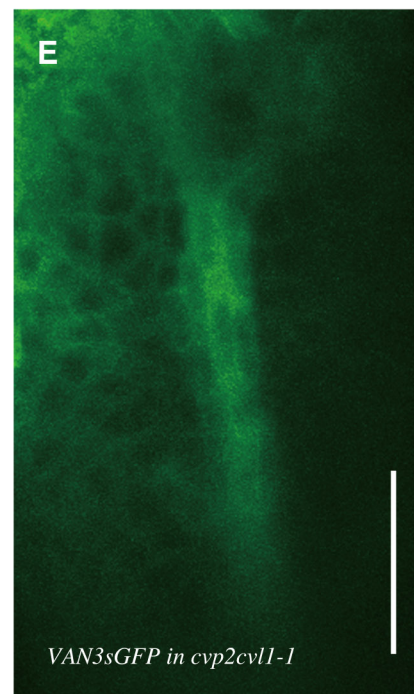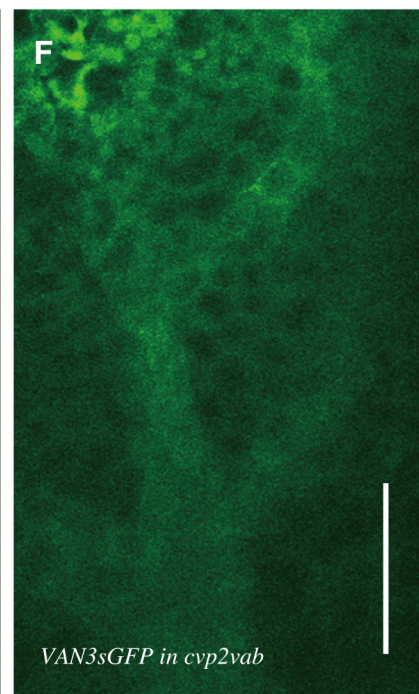

Supplement: dev030098-sup-030098-figs1.pdf [file dev030098-sup-030098-figs1.pdf]

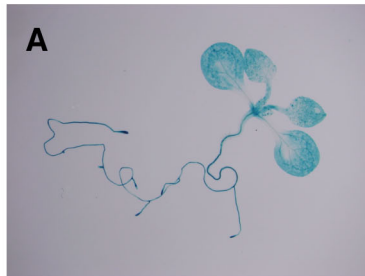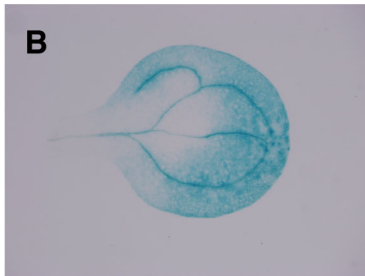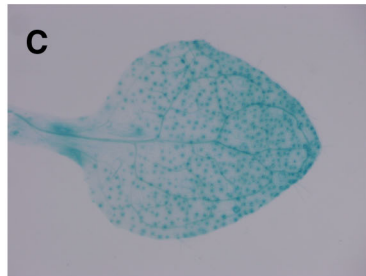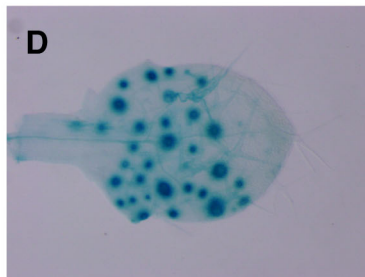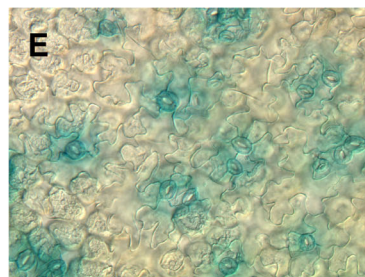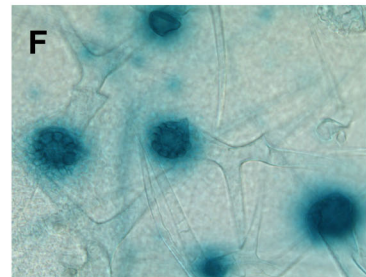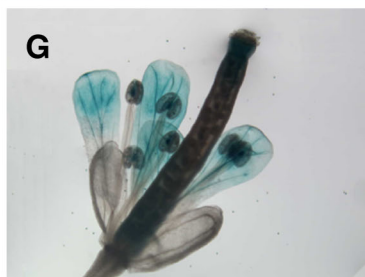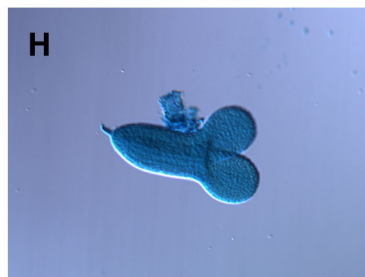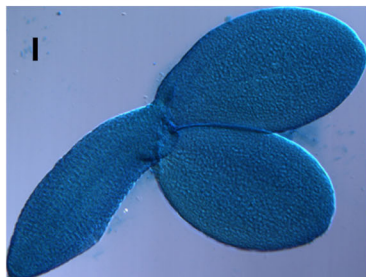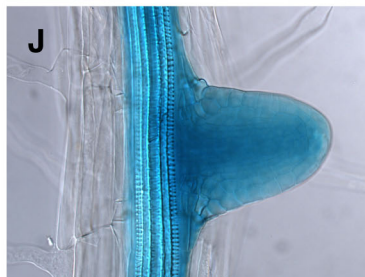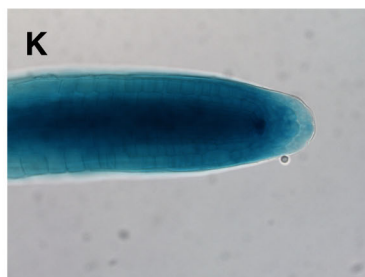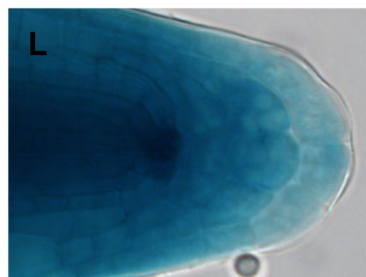

Supplement: dev030098-sup-030098-figs2.pdf [file dev030098-sup-030098-figs2.pdf]

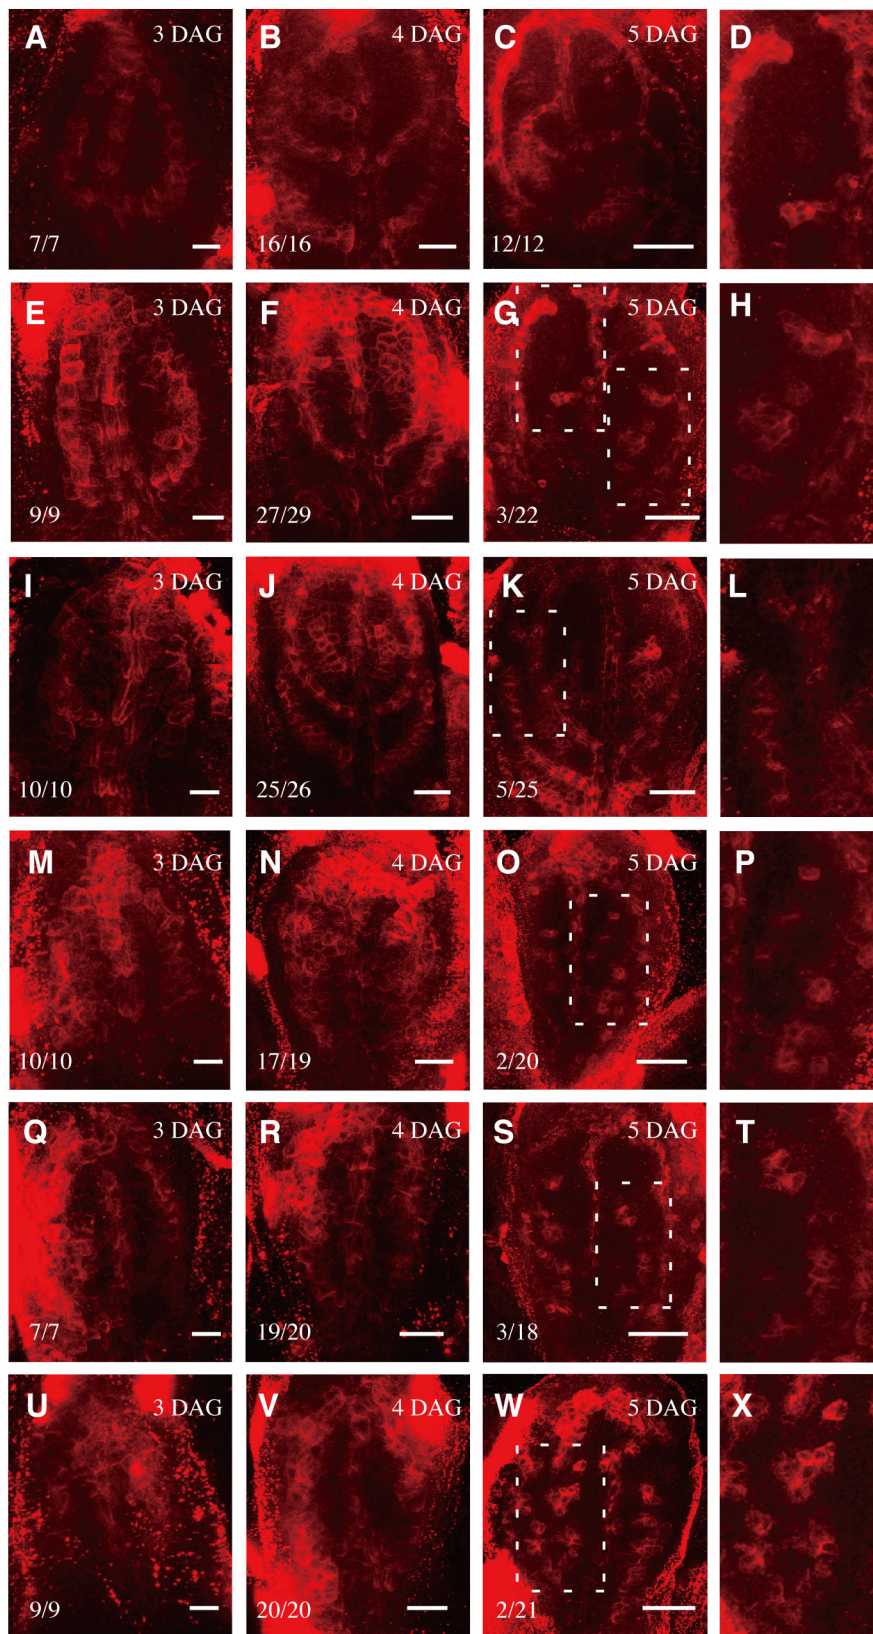

Supplement: dev030098-sup-030098-figs4.pdf [file dev030098-sup-030098-figs4.pdf]

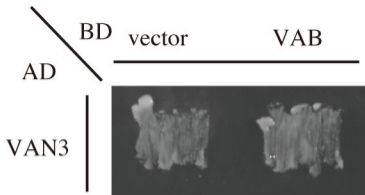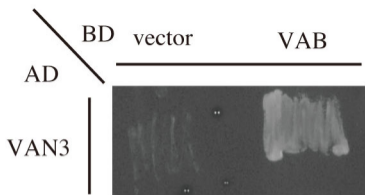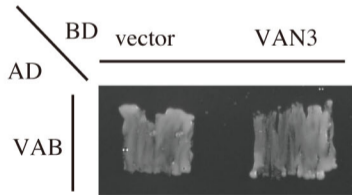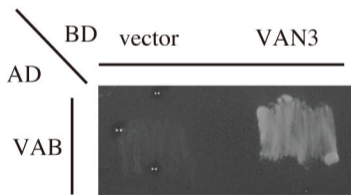

+ HIS

- HIS

Supplement: dev030098-sup-030098-figs5.pdf [file dev030098-sup-030098-figs5.pdf]

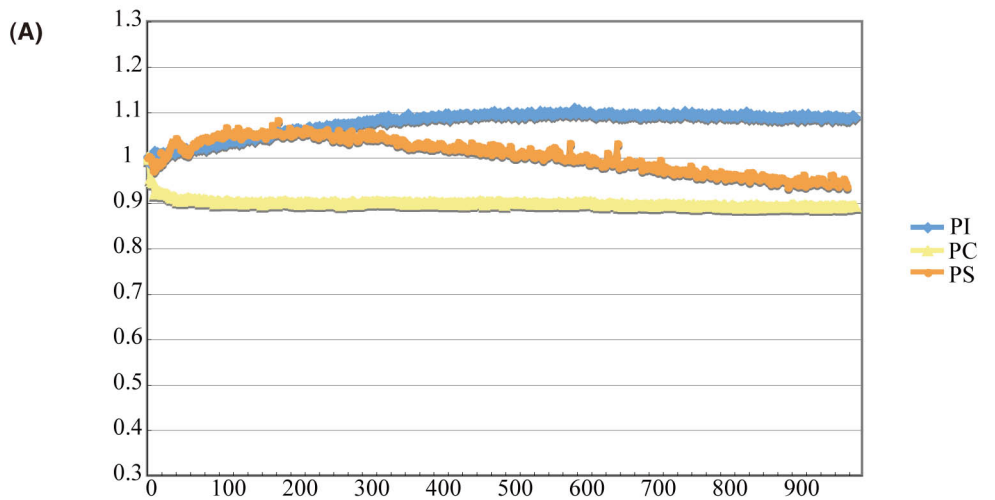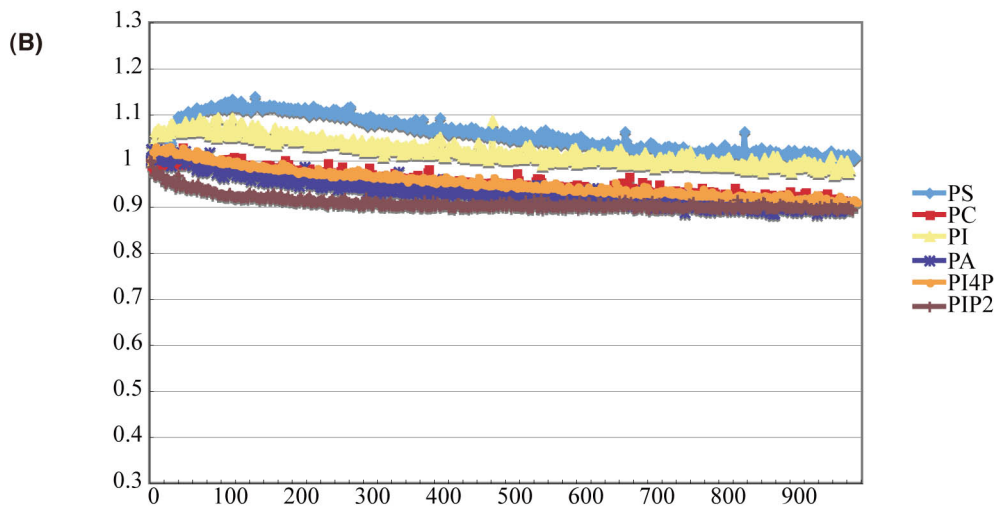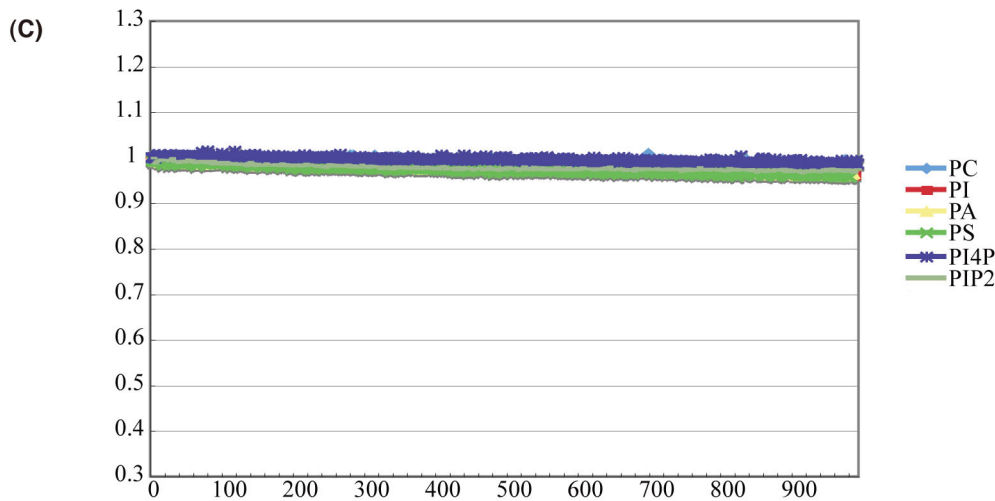

Supplement: dev030098-sup-030098-figs6.pdf [file dev030098-sup-030098-figs6.pdf]
